# Supplementary material for: Transcriptome Analysis Identifies a 140 kb Region of Chromosome 3B Containing Genes Specific to Fusarium Head Blight Resistance in Wheat
Source: MDPI journal article supplement (doi:10.3390/ijms19030852), 2018-03-14
Supplement: s1 [file s1]

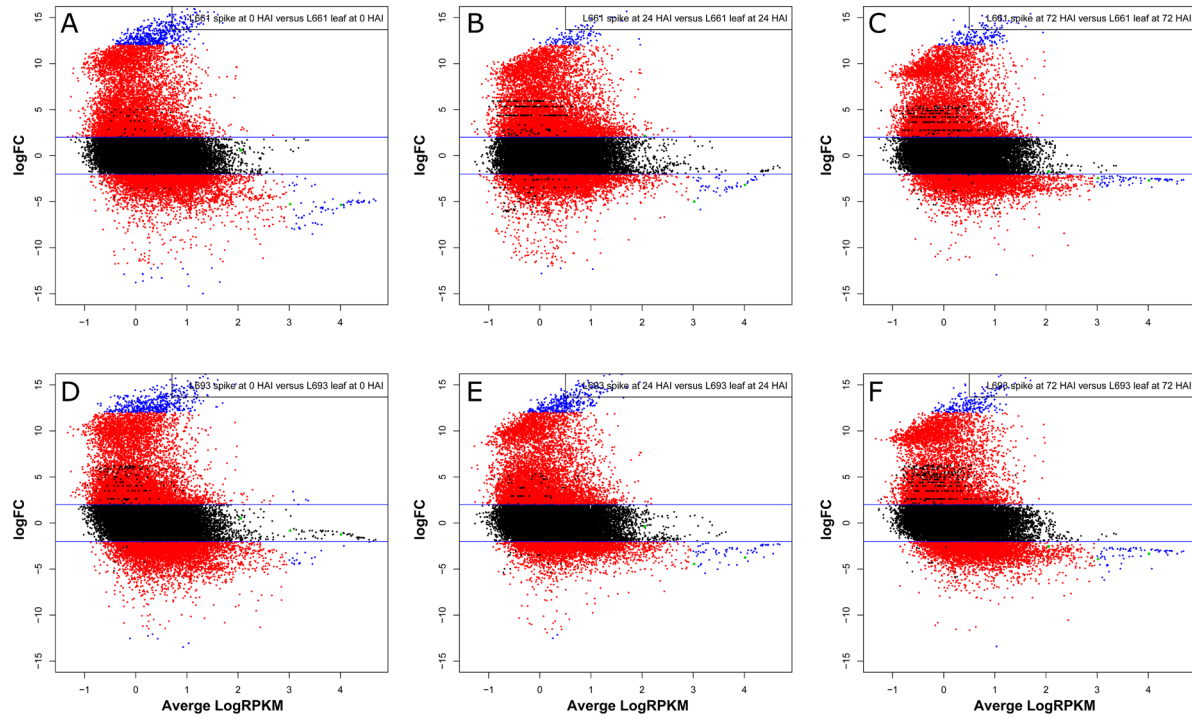

**Figure S1.** Log-fold change (logFC) against logRPKM in different tissues. Differentially expressed genes with an FDR of <5% and a log-fold change of >2 are highlighted in red. In each comparison, red dots below the blue line (logFC < 2) representing up regulated genes in leaf or down regulated genes in spike, in opposite, red dots above the blue line (logFC > 2) representing up regulated genes in spike or down regulated genes in leaf. The blue dots representing gene(s) with extreme value with  $-12 > \logFC > 12$  or have Average logRPKM more than 3. The green dots represent the interested gene in this study, rectangle for MSTRG.24516, circle for MSTRG.24551, triangle for MSTRG.24552.

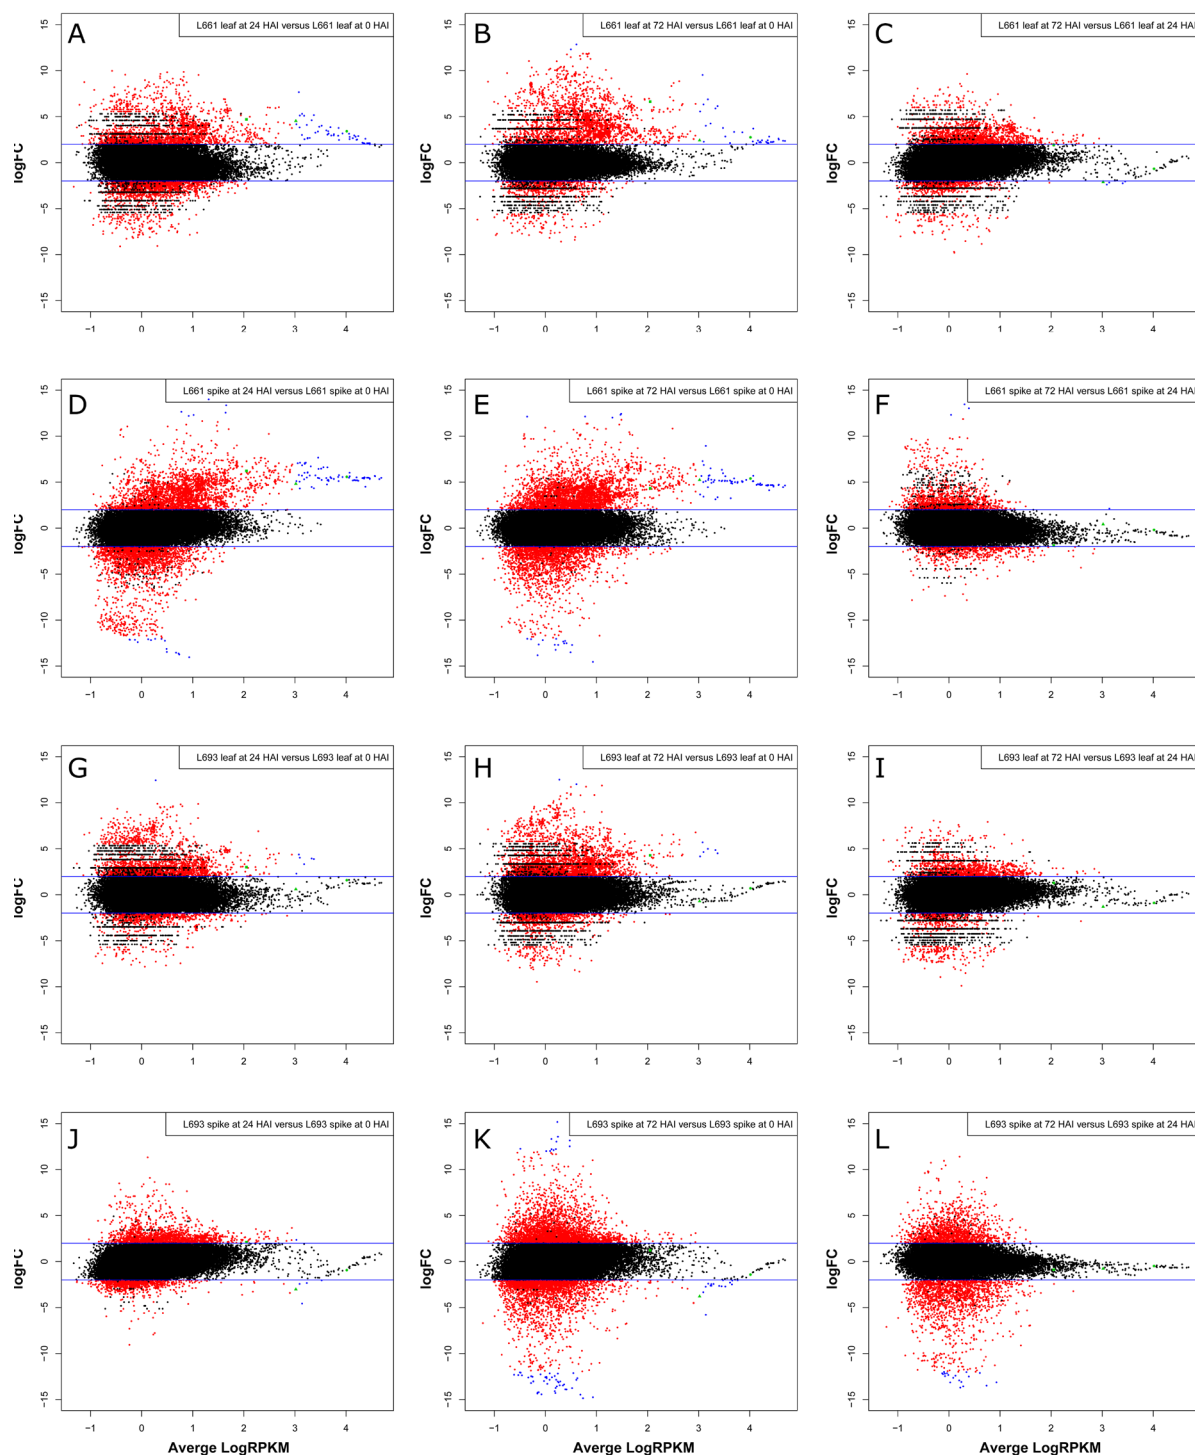

**Figure S2.** Log-fold change (logFC) against average logRPKM at different time points. Differentially expressed genes with an FDR of <5% and a log-fold change of >2 are highlighted in red. The blue dots representing gene(s) with extreme value with  $-12 > \logFC > 12$  or have Average logRPKM more than 3. The green dots represent the interested gene in this study, rectangle for MSTRG.24516, circle for MSTRG.24551, triangle for MSTRG.24552.

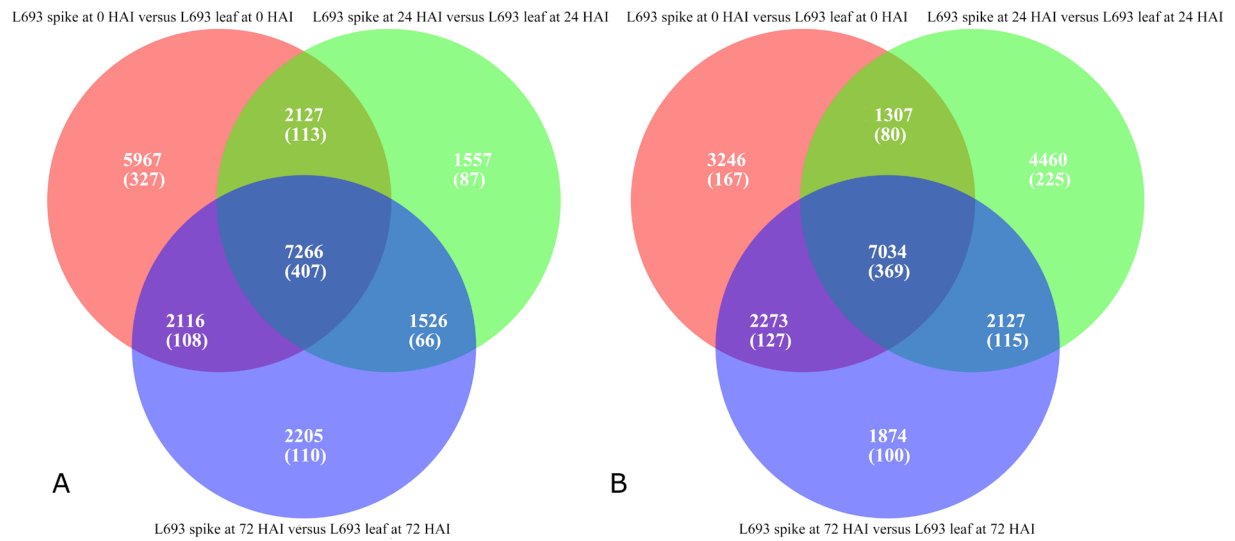

**Figure S3.** Venn diagram displaying the number of differentially expressed genes between the leaves and spikes of L693 (**A**) and L661 (**B**) plants at 0 h (red), 24h (green), and 72 h (blue). Numbers without parenthesis stand for different expressed genes over the whole genome, numbers with parenthesis stand for different expressed genes on wheat chromosome 3B.

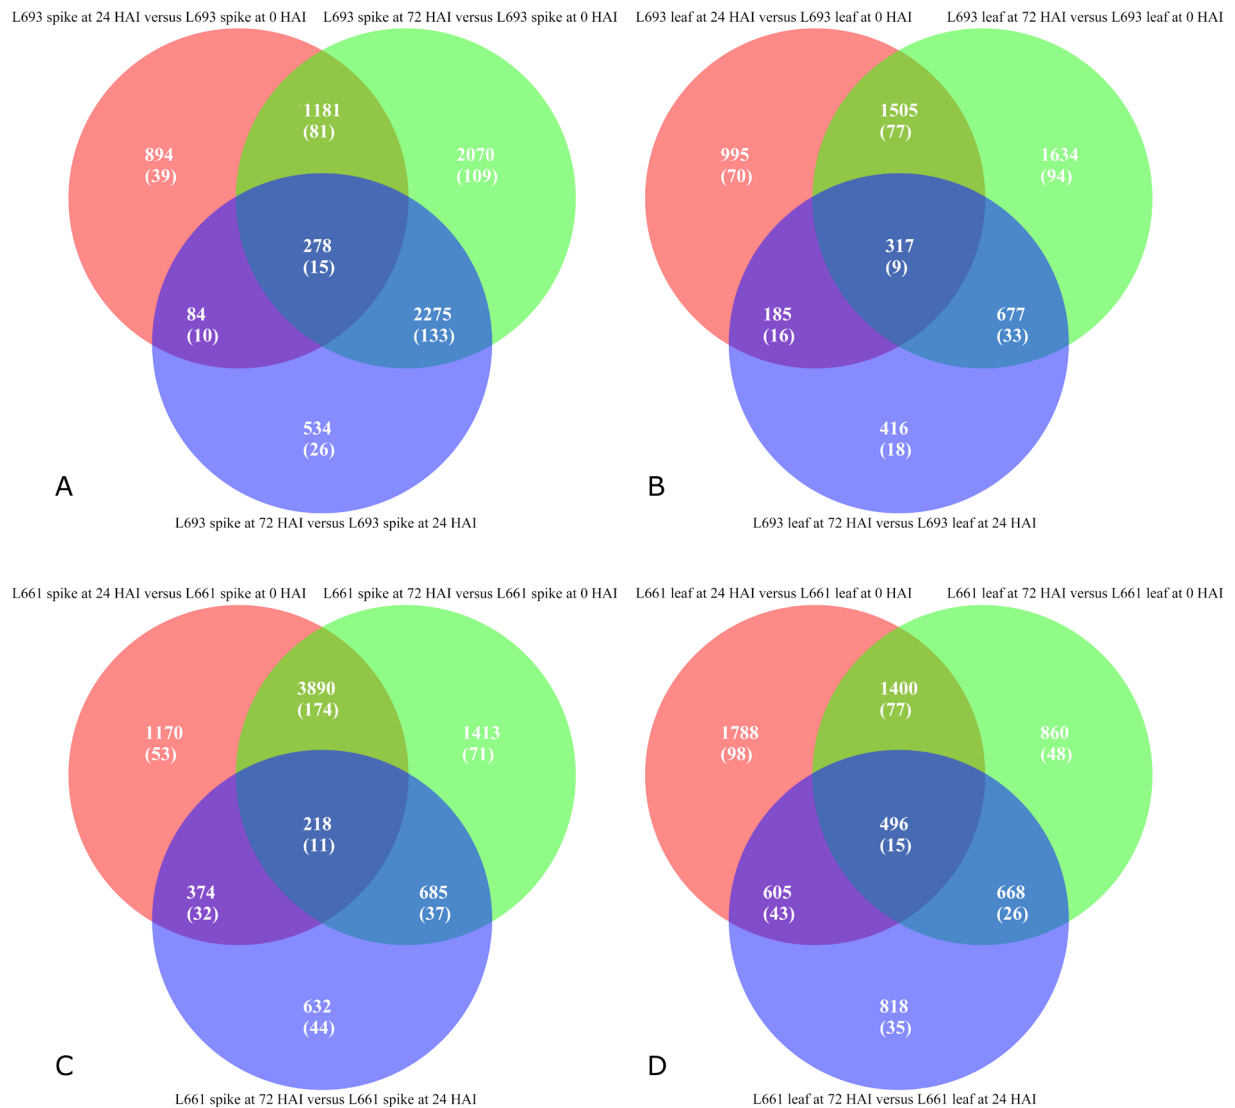

**Figure S4.** Venn diagram displaying the number of differentially expressed genes in the L693 spike (A), L693 leaf (B), L661 spike (C), and L661 leaf (D) at 0 h and 24 h (red), 0 h and 72 h (green), and 24 h and 72 h (blue). Numbers without parenthesis stand for different expressed genes over the whole genome, numbers with parenthesis stand for different expressed genes on wheat chromosome 3B.

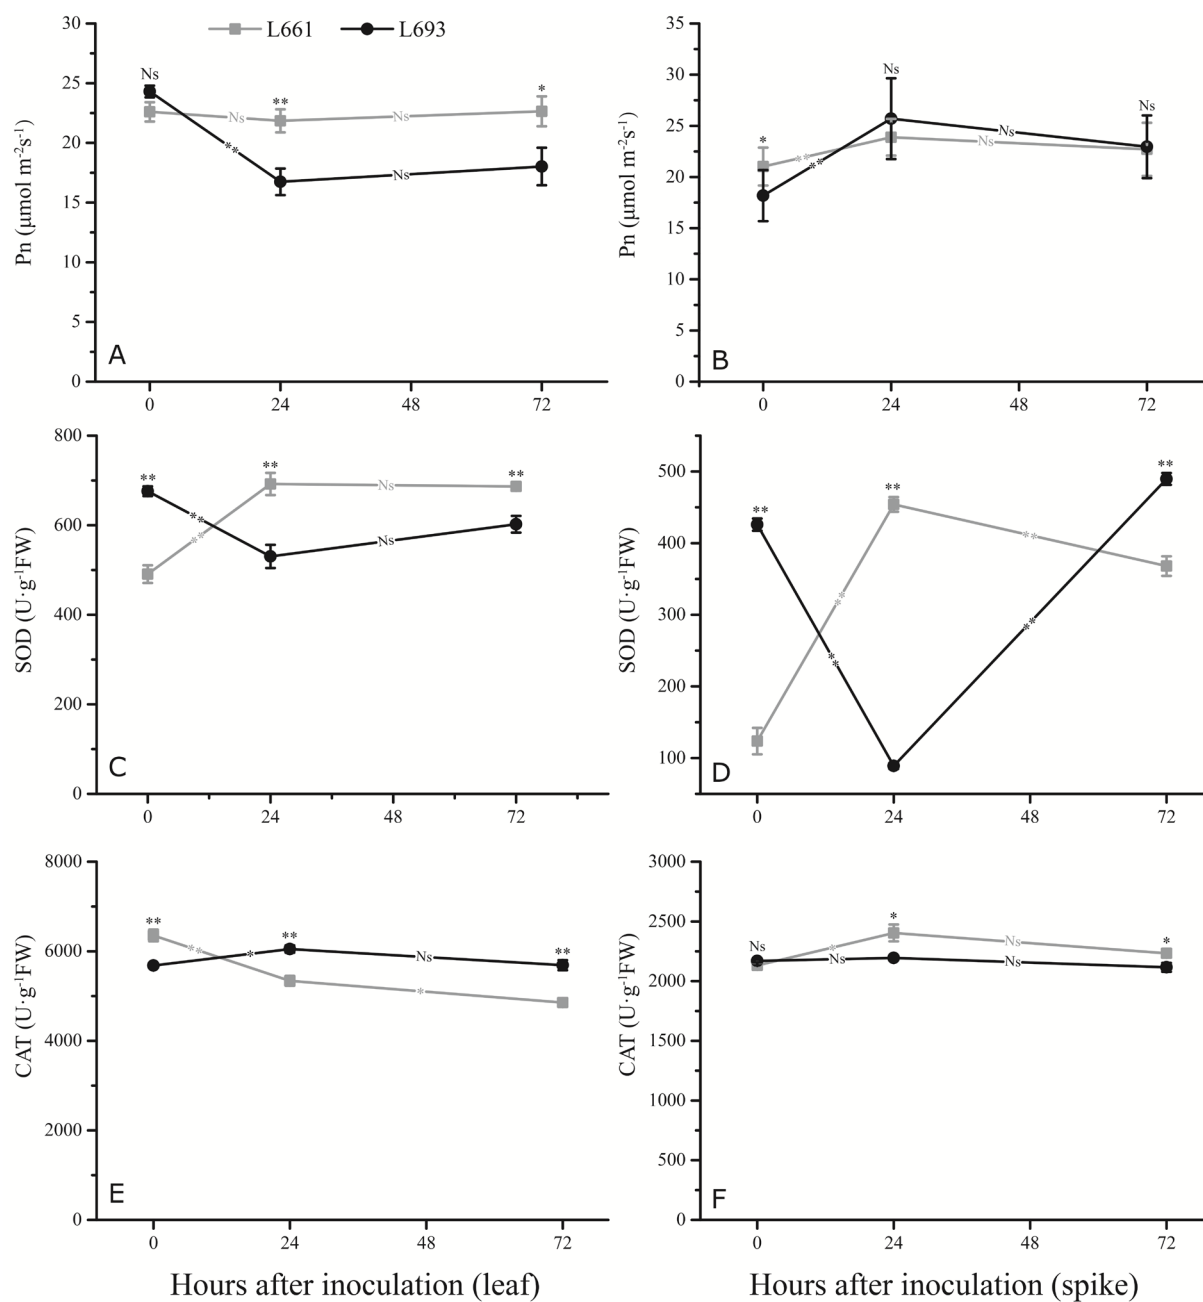

**Figure S5.** Changes in net photosynthetic rate ( $P_n$ ) in the leaf (A) and spike (B), antioxidant enzyme activity (SOD) in the leaf (C) and spike (D), and catalase activity (CAT) in the leaf (E) and spike (F) following *Fusarium graminearum* inoculation.
