# Supplementary material for: Transcriptome Analysis Identifies a 140 kb Region of Chromosome 3B Containing Genes Specific to Fusarium Head Blight Resistance in Wheat
Source: Int J Mol Sci. 2018 Mar 14;19(3):852. doi: 10.3390/ijms19030852 (PMC5877713; doi:10.3390/ijms19030852)
Supplement: Supplementary file 1 [file ijms-19-00852-s001.zip]

Archive with 11 entries (11 files):
- Fig 4.tif
- Fig 5.tif
- Fig 6.eps
- Fig 7.tif
- Fig 8.eps
- Manuscript to IJMS  (2018-01-31).docx
- Fig 1.tif
- Fig 2.eps
- Fig 3.eps
- Supplementary Material 2.zip
- Supplementary Material 1.pdf
